# Supplementary material for: Walking out of the light verb jungle: Exploring the translation strategies of light verb constructions in Chinese–English consecutive interpreting
Source: Front Psychol. 2023 Mar 15;14:1113973. doi: 10.3389/fpsyg.2023.1113973 (PMC10050874; doi:10.3389/fpsyg.2023.1113973)
Supplement: Supplementary file 1 [file Data_Sheet_1.xlsx]

## Sheet: raw data set
Student No.	L1		L2		L3		L4		L5		L6		L7		L8		L9		L10		L11		L12		Q1	Q2	Q3	Q4	Q5	Q6	Q7	Q8	Q9	Q10	Q11	Q12	Q13	Q14	Q15	Q16	Q17	Q18	Q19	Q20	Q21	Q22	Q23	Q24	Transcription
01	B	V	F	X	C	V	C	V	A	V	E	V	A	V	A	V	A	V	A	V	B	V	A	X	D	D	D	D	D	D	E	D	D	D	D	C	E	E	E	E	E	E	E	E	E	E	E	D	From what you have said and about background and issues you highlighted, you concluded your question, what China and US the current relation is. And from 40 years after China and the United States formed foreign affair relations, they are always been in a positive area, and even through those difficulties, they are all to good aspect. And for the common benefit for each country, steady bilateral …
02	NA	X	A	X	G	V	NA	X	F	V	G	V	C	X	A	X	A	X	F	X	I	X	NA	X	D	C	D	C	A	D	D	A	D	D	D	D	D	B	D	D	D	D	D	D	D	D	B	D	You have a lot of questions in describe the background and bring in many problems. There are 40 years between China and America, we have the mutual…now change in the…. There is a common benefit between China and America, and the relationship between China and American is never change. Of course the relationship between China and America is stable, but there are also have some problems, such as th…
03	C	V	NA	X	A	V	F	X	C	V	E	V	A	V	NA	X	A	V	A	V	B	V	A	X	E	C	A	C	E	E	E	E	E	D	E	E	E	E	E	E	E	E	E	D	E	E	C	E	You have a lot questions in what you have a core question, what is the condition of America and China now and what about the future. In the past 40 years, America and China’s relationship is mixture and complex. While continue to go ahead we have the mutual benefit in the bilateral relations, the bilateral relations is beneficial to each other and the world. I think the trend of our relationship …
04	B	V	A	V	C	V	C	V	A	V	G	V	C	V	A	V	A	V	A	V	J	V	A	V	E	E	D	E	E	E	E	E	E	C	E	E	E	E	E	E	E	E	D	E	E	E	C	E	You mentioned a lot of information about the background and you raised a lot of questions. And finally you concluded your question to a simple one, which is, how is the relationship between China and the US now, and how it will develop in the future. As far as I am concerned, during the past 40 years of the diplomatic relationship between China and US has established, it has been moving forward a…
05	A	V	A	V	A	V	C	V	H	V	G	X	C	V	A	V	A	V	A	V	B	V	A	V	D	D	D	D	D	D	E	D	D	D	D	D	D	D	D	D	D	D	D	D	D	D	D	D	You have so many questions, you have already made a brief summary, so your question is, what is the China-US relationship now and where to go in the future. China and the US have reached the political ties for 40 years where we have achieved a lot, and also encountered setbacks. Still, our relationship will go forward, because China-US relationship has a wide mutual benefit, and the stability of …
06	B	V	A	V	A	V	C	V	A	V	G	V	C	V	A	V	A	V	A	V	B	V	A	X	C	B	C	B	C	C	C	B	C	C	C	C	C	C	C	B	C	C	B	C	C	B	B	B	I think you question maybe include two parts, the first part is the moment and the second part is the future, and the moment and future relationship between American and China. First, at the moment, after we becoming close friends for 40 years, our relationship is moving forward, and becoming close. And we achieved many agreements, and we experienced some frictions. But I believe that we have a l…
07	A	V	A	V	A	V	C	V	F	V	F	X	A	V	G	X	A	V	A	V	B	V	B	V	D	E	D	A	D	D	E	C	E	D	D	E	E	E	E	E	E	E	E	D	E	E	A	D	About your background and your question, it is too much, so I have made a summarize that how China and the US relationship will develop. Since the China and the US relationship founded, it has been moving forward and gained great achievement. We experienced frustrations, but the trend of moving forward is not changed, because China and the US have the wide interest and the common interests are bi…
08	NA	X	NA	X	C	X	F	X	F	V	E	V	A	V	A	V	A	X	A	V	B	V	A	V	D	B	D	B	E	D	E	C	D	D	D	B	E	E	E	D	D	E	E	D	D	C	B	A	You describe a lot of backgrounds, and your questions are really how the relationship between China and America and what is the future of China-America relation. From China become the friend of US 40 years ago, the relation is all the time go on with problems, but the common benefit is larger than the problems. We hope we have a good bilateral relations and I think the trend will be all the time …
09	A	V	NA	X	A	V	A	V	A	V	E	V	A	V	NA	X	A	V	A	V	NA	X	A	X	C	B	B	B	D	D	D	D	D	D	D	B	D	D	B	B	D	D	D	B	D	D	B	A	You has many questions, but you have already made a summary, I think America and China’s relationship must develop continuedly, although we have many challenges, but we have the common benefit even though we have many conflicts. I think American and Chinese relationship should maintain the stability bilateral relations, it benefit for Chinese and American’s even the world. And I think our relatio…
10	A	V	A	V	C	V	C	V	NA	V	E	V	A	V	A	V	A	V	A	V	I	X	F	V	D	B	C	D	D	D	D	A	C	C	D	B	D	D	D	D	C	D	D	C	D	C	A	A	Your question is complicated, and you made a conclusion. I think 40 years of our relations, we have get big success about our relations and we experienced various challenges, but the trend of keep going still not change. Our mutual benefit is more important than the disagreement between the two countries. I think the stable relation between us not only be beneficial to our own countries, but also…
11	B	V	A	X	A	V	A	V	A	V	E	V	C	V	A	V	A	V	A	V	I	X	A	V	E	E	E	C	E	E	E	E	E	E	E	E	E	E	E	E	E	E	E	E	E	E	E	C	If we summarize what you just said, I can see your question actually is, what is the relationship between China and America, and what kind of future we will have. I think through 40 years, the relationship between China and America is actually, we have been looking forward, and we have been improve together. We already achieved a lot of achievements, and we also get through many difficulties. Alt…
12	A	V	NA	X	F	X	C	X	B	V	G	V	C	V	A	V	A	X	A	V	A	X	A	V	D	D	B	B	D	D	D	B	C	C	D	D	D	D	C	B	D	D	C	C	D	D	A	D	We have a lot of background descriptions and questions, but you do the core description, how about the bilateral relationship and the future should we go. The reform and opening up between China and America have made frictions which is changeable and mutitate. However, the tendency about keep going is not change, the benefit between China and America is very wide, and I think their commons is mor…
13	A	X	A	X	A	V	A	X	A	V	A	X	C	X	A	X	A	X	A	X	B	V	A	X	D	A	C	D	C	E	E	C	D	C	D	D	E	D	D	D	D	D	D	D	D	D	C	D	The description of the background and questions are quite a lot, but you have the conclusion that how is the relationship between China and the US and how develop it is. 40 years ago, China and America had the trade relationship, and they keep going forward, and they have achieved a lot of achievements. But there are some difficulties, but the big trend is stable. And China and America have the m…
14	NA	X	F	X	A	V	A	V	G	V	C	V	A	V	A	V	A	X	A	X	B	V	A	V	C	D	A	A	C	D	D	C	B	D	C	C	C	D	C	C	D	D	D	B	B	C	A	B	You have a lot of questions, but your major question is how about the China-US relation and what is their future. 40 years ago, China and the US, their relation is always good, and there are ups and downs in this period, but the big trend of going forward is not changed. And we have the common mutual benefit, and I think we should maintain the stable bilateral relation and this is beneficial for …
15	B	V	A	X	A	V	C	V	F	V	G	X	C	V	A	X	A	X	A	V	I	V	A	V	D	E	D	A	D	D	E	D	D	D	C	E	D	E	D	D	D	D	D	D	E	D	C	E	As mentioned, there are many problems between us, so I concluded it as what is the China-US relationship now and how about the road up to the future. Since the relationship between China and the US were 40 years, and now our relationship is always good and achieve great achievement. And although the problem is appear a lot, but the trend is great, it will not be changed, because China and the US …
16	A	V	A	V	A	V	A	V	C	V	F	V	A	V	A	V	A	X	A	V	B	X	F	X	E	E	D	C	E	E	E	B	D	C	E	C	E	E	E	A	E	E	E	D	D	C	C	C	You talk many backgrounds, and I made a conclusion that how about the relationship between China and the US, and what the future will go. I believe the friendship with America during 40 years, we made many great process and the road is very difficult, I believe the trend of go forward will not change, and the relationship between the two countries because we have more benefit than our division. C…
17	C	X	NA	X	NA	X	A	X	NA	X	A	V	C	V	A	X	NA	X	F	X	I	X	A	X	D	D	C	C	C	C	D	C	D	C	D	D	C	D	D	D	C	C	D	D	C	D	C	D	About the background expressions and question, the main is the relationship between China and America and how the relationship go in the future. In the 40 years, China and America have many difficulties but the main trend is to go forward. Although we have many same… it is much bigger than the differences. To set a bilateral relation is good for not both our countries but the world. And that main…
18	A	X	A	V	A	V	A	V	C	V	E	V	C	V	A	V	A	V	B	V	B	X	A	X	E	C	D	B	D	E	E	B	D	C	E	C	E	E	D	D	E	E	D	D	E	C	B	B	I have an conclusion here that about the relation between China and America. Since the relationship between China and America for 40 years, we have keeping forward. And we have achieved a lot of success and challenges. The big trend of going forward will not change, and we have the same benefit widely, and the benefit between us is larger than the discrimination between us. And we will keep the s…
19	NA	X	A	V	A	V	A	V	A	V	A	V	C	V	A	X	A	V	A	X	C	V	A	V	E	B	A	B	B	E	E	E	E	E	D	B	D	D	B	D	D	D	D	D	B	E	C	A	Your background description and question is a lot but yourself say that you talk about China-US relationship and future movement. I think China and America cooperated for 40 years, and we keep move forward together and achieve great achievements. Although it keeps changing, but the trend of moving forward is not changed, because China and America have wide same benefit, and it is bigger than diff…
20	A	V	A	V	G	V	A	V	A	V	A	V	C	V	A	V	A	V	A	V	I	V	A	V	D	D	D	D	D	D	D	D	D	D	D	D	D	D	D	D	D	D	D	D	D	D	D	D	First there are many description of the background and questions, so I made the summary, what is it between the relationship of China and the US, and what will it be in the future. I think from the 40 years since China and the US established diplomatic relationship, our relationship has moved on and make fruitful progress. Although there are many difficulties and differences in the progress, the …
21	B	X	A	V	G	V	A	V	G	X	A	X	C	V	A	V	A	X	A	X	B	V	A	V	E	C	B	C	E	E	E	E	E	E	E	E	E	E	E	E	E	E	E	E	E	E	C	C	The background you depict and the issue you posed to concluded as that, how the China-US relation to go. Since the China-US friendship established 40 years, we have achieved plenty of fruits, although there are some difficulties, and the trend of moving forward will not change because there is plenty of common interest between China and US, the risks is less than interests. And China and US keep …
22	A	X	A	V	A	V	A	V	A	V	E	X	F	X	A	X	A	V	A	V	B	V	F	V	C	A	C	B	C	C	D	D	D	C	C	C	D	B	C	D	D	D	C	C	D	D	C	D	How does the relation between China and America, and how to go further? From the start of China and US made a relationship 40 years, we are always go forward, and we get big results. Also, in this process, we made some problems, but the trend of going forward is not changed. China and the US has common benefit, China and America should made a steady relations, it can benefit each other and the wo…
23	G	V	G	V	G	V	A	V	G	X	G	V	A	V	A	X	A	V	A	V	B	X	A	V	D	A	C	C	C	D	D	C	C	C	D	B	D	D	C	C	D	D	D	C	D	B	C	C	According to the description of the background, there are many problems you asked, there is a core thing that how the China-US relations now, and how to deal with in the future. For the partnership between China and the US 40 years from now, China-US relations is keeping move on, and there are many progresses. And this trend that keep moving up is never change, and because there are many common b…
24	B	V	A	V	A	V	C	V	C	X	A	V	C	V	A	V	A	V	A	V	B	V	A	V	C	D	A	A	C	D	D	C	D	D	D	D	D	D	C	C	D	D	C	D	D	D	C	D	You have so many questions so I summarize them, next I will answer that, how the relationship between China and America is and will be. The relationship between China and America has been forward in the 40 years, and we had a lot of efforts. The main trend is going forward in frictions. We have more common benefits than frictions. The constant relationship between China and America is not only be…
25	A	X	A	V	A	V	F	V	F	V	G	X	C	V	A	V	A	V	A	V	B	V	A	V	D	E	E	D	D	E	D	D	E	E	D	D	E		D	D	D	E	D	D	D	D	D	D	You have come up with a lot of questions, but you have a summary which is that, how about the relationship between China and the United States and what is the future of the relationship. In the past 40 years, the relationship of China and the US is always going forward, and we have achieved fruitful development, and also there are many challenges during this process. but I think the whole trend o…
26	G	V	F	X	C	X	A	V	C	V	G	X	C	V	A	V	A	V	A	V	I	X	A	X	E	A	E	B	A	D	E	A	C	C	D	D	D	D	D	C	D	D	D	D	D	B	A	B	To above this background, there is a conclusion, there are two questions: how about the relationship between China and America, and how about their relationship will be in the future. And in my point of view, China and America has make a relation already 40 years, and they are continuing to go ahead. In this process, their achievement is great and will not change, the continuing going trend will …
27	A	X	A	V	A	V	A	V	A	V	F	V	C	V	A	V	A	V	A	V	I	V	A	V	E	C	C	C	E	E	E	E	E	C	E	D	E	E	C	A	E	E	E	E	E	E	C	C	Your description of the China and the US and raised many questions about it. So what is the real relationships between China and the US, and what is the future about them. Since we establish our relationship for 40 years, our two countries kept going forward and gained many achievements. Though there are still some difficulties between us, but the thing is that we keep going forward, and we have …
28	B	X	A	V	A	V	C	V	A	V	G	V	C	V	A	V	A	V	A	V	I	X	A	V	D	E	C	E	E	E	E	C	A	E	E	E	E	E	E	A	E	E	D	E	E	E	B	A	There are many problems and descriptions of the questions. I will conclude it to how about the US China relationship in present and how it will be. It's 40 years after China and America made friendship. The relationship is keep going forward and we make good results. There are many difficulties in the process but we always keep going forward. This trend is never changed. China and America have wi…
29	NA	X	A	X	C	X	NA	X	A	X	A	V	C	V	A	V	NA	X	A	V	B	V	A	V	D	B	D	C	D	D	E	A	D	C	D	C	D	E	D	D	D	D	D	D	C	C	B	C	There's a lot of questions and background knowledge about China and US relationship, but all in all over the 40 years since China and US have relationships, the good relationship never change. W have a lot of benefits , but the great trend never changed. The mutual benefits are more than risks. The US and China relationships not only benefit to the China and US but also benefit to the whole world…
30	B	V	NA	X	C	X	C	X	F	V	F	V	A	V	A	V	A	V	A	V	B	V	A	V	E	B	D	A	D	D	D	A	D	D	D	A	D	D	D	D	D	C	C	D	D	A	C	A	Your description of background and questions is more and I summarize it. what on earth... how we.. how America and China's relationship and how to continue the relationship. Since we made friends for 40 years, China and American are going up although the frustration is always existing. The trend of going ahead will not changed. Widened common profits is more than differences. And the stable bilat…
31	G	V	A	V	NA	X	A	X	A	V	G	V	C	V	A	V	A	V	A	V	I	X	A	V	D	B	C	C	B	D	D	D	D	C	D	D	D	D	C	D	D	D	D	D	D	D	D	C	The description of background and questions is too much so there's a conclusion: how about the relationship between America and China and how about the future. I think for the 40 years China and America are move forward and get a great result. Although there are many problems and many things changed but the trend is not changed. The mutual benefit is much more important than the frictions. Keep t…
32	D	V	NA	X	G	V	A	V	NA	V	G	V	B	V	NA	X	A	V	F	V	B	V	A	V	C	B	C	B	C	C	C	B	C	C	C	C	C	D	D	C	C	C	C	C	C	C	C	D	There's many questions and the background is complex. It can be concluded to what is condition of the relationship. I believe that China and America can make 40years…The relationship is always go ahead although there's some conflicts. Because there are so many mutual benefits between China and America and it's more important than the conflict. And China and America keep stable bilateral relations…
33	B	V	A	X	A	V	A	V	A	V	G	V	C	V	NA	X	A	V	A	V	I	V	A	V	E	E	C	A	B	E	E	D	C	C	D	D	E	E	C	D	C	E	C	D	A	A	A	A	You conclude that how about the relation between China and American and how to keep it. I think it has go ahead since we set the relationship 40 years ago, and we get a lot of achievements, also some troubles but the trend is unchanging. we have a lot mutual benefits, and this mutual benefit is more than the conflict. And I think keep the steady relation is beneficial to both of Chinese and Ameri…
34	A	X	A	V	A	V	A	V	A	V	E	V	NA	X	A	V	A	V	A	V	B	V	A	V	E	C	D	A	E	E	E	E	C	E	E	B	E	E	C	D	E	D	E	B	D	D	D	A	your background and questions are so many so I have the conclusion. What is this relation of Sino-America now and what is their future. I think since the 40 years of American and China set up the good relationships, we have always move forward and we made great progress even though we face many obstacles. But I believe the trend is keeping forward because we share the same benefits which is more …
35	NA	X	A	V	A	V	A	X	A	V	A	V	C	V	A	V	A	X	A	V	I	X	A	V	E	A	C	A	E	E	E	E	C	C	E	E	E	E	C	A	E	E	E	E	C	C	A	A	After China and US have connection about 40 years we constantly make progress. Although we two countries had a lot of problems but our trend is always make progress, which isn't changed. We have our mutual profit and our profits are bigger than our differences. We should have stubborn bilateral relationships which is not only benefit to each other, it's also benefit to the whole world. So our rel…
36	NA	X	A	V	A	V	A	V	F	V	A	V	C	V	A	V	A	V	A	V	B	V	A	V	E	C	D	B	D	E	E	C	D	E	E	C	E	E	E	D	D	D	D	D	D	E	C	C	China and the US have developed their relationship 40 years ago and their relationship is moving forward all the time and reached fruitful achievement. Now the relationship with the changeable background, the major tendency of the relationship between China and US will continue keeping forward because China and US shared a lot of mutual benefits and these benefits are larger than the differences …
37	NA	X	A	X	A	X	A	V	A	X	E	X	C	V	A	X	A	V	A	V	I	X	A	X	E	A	A	A	E	E	E	A	B	E	D	A	E	E	B	B	E	E	E	E	E	B	A	A	The description of the background and question you ask is too much and I ...that the problem of the how is the relationship of Sino-US and the future of Sino-US. During we have a good relationship of Sino-US, we go forward now and obtain a lot of great goals. It is a changeable thing, but the trend of world is not to change because we have the same benefit and this benefit is bigger than the argu…
38	B	V	NA	X	A	V	C	V	A	V	E	V	A	V	A	V	A	V	A	V	B	V	A	V	D	D	D	C	D	D	D	D	D	A	D	D	D	D	D	D	D	D	D	C	D	D	C	D	The problem is why we have concluded it. How is the relationship between China and America and how is going to be. I think since the Chinese and Americans relation established 40 years, our relationship have been on the ward. Although the process is tough and changeable, but our tend is great trend because China and American have wide mutual benefit. Our relationship stability is not only benefic…
39	A	V	NA	X	G	V	C	V	A	V	G	V	C	V	A	V	A	V	A	V	I	V	A	V	D	B	D	B	D	D	D	C	D	D	D	B	D	D	B	D	D	D	D	A	D	D	A	D	There are a lot of questions and you have made a summary that where will our relationship between China and America go. Since our two countries be friendly to each other, it has been 40 years. But the trend we are looking forward is always, although in the process we have a lot of barricades, but the trend doesn't change. There are a lot of common benefits between China and America and we have mo…
40	C	X	A	X	A	V	A	V	F	V	G	V	A	X	A	V	A	V	A	V	B	V	A	X	E	B	E	E	B	E	E	E	E	E	E	B	E	E	E	D	E	E	D	E	E	B	B	C	There are a lot of background descriptions and questions raising in the US-China relationships and core summarize is that how could US and China relationship be and how should we moving forward. In the 40 years, US-China relationship has been moving forward since we built up our relationship and we have achieved sustainable and numerous achievements. But the tendency of moving forward haven't cha…
41	NA	X	A	V	A	V	C	V	A	V	G	V	C	V	A	V	A	V	NA	X	I	X	A	V	C	B	E	C	D	E	E	C	E	C	E	B	E	C	B	B	E	E	E	D	E	B	B	C	Where and how's China and American will go in the future, I like to say China and American have become partner for 40 years and China and America has always made big progress in this process. We gain a lot of achievements although there are a lot of changes, but the tendency was to achieve some great result. And China and American has a lot of common benefits, the benefit is much more than the co…
42	A	X	A	X	E	V	B	X	A	X	G	X	C	X	A	X	A	V	E	X	B	V	A	V	C	B	D	C	C	D	D	D	C	C	D	A	D	D	D	C	D	D	D	D	D	C	A	C	There are a lot of descriptions of the background and the raised questions so I have the conclusion about the relationships of China and America's trade system and I want to know what exactly are the benefits or the development of relationships between China and US and I think the 40 years between the development of the relationships of China and America,we are still constant continuing and we ha…
43	B	V	F	V	A	V	A	V	B	V	A	V	A	V	A	V	E	X	A	V	I	V	A	V	D	C	D	D	C	D	D	C	D	C	D	B	D	D	C	D	D	D	D	D	D	B	B	D	Your description of the background and questions are too many, I will summarize it as how is the relationship between China and America nowadays and how’s the future. I think since China and America established the relationship for 40 years, it has been moving forward. There are many difficulties but the trend of looking forward is not changed at all, because China and America has many mutual ben…
44	B	V	NA	X	A	V	NA	X	A	V	E	V	C	V	A	V	C	X	A	V	I	X	NA	X	C	A	C	E	E	C	E	E	E	E	C	C	E	C	B	B	E	B	E	E	D	B	B	B	The background you describe and the problems you ask is many, but I’d like to concluded it. The relationship of China and American has been 40 years, what you ask is how is the relationship between Chinese and American and what is our future. I think since we start our relationship for 40 years, we keep going forward and it’s fruitful although the process has many difficulties, but we still keep …
45	C	V	A	V	A	V	F	V	A	V	G	X	C	V	A	X	A	V	A	V	A	X	A	V	E	B	C	C	A	E	E	E	C	E	D	C	D	E	C	C	E	E	E	C	E	C	B	A	So your main question is about the relationship between China and the US. I think, for 40 years, the relation between China and the US always keep forward and it has gained a lot of great results. Although things change, but the trend of keeping forward will not change. The bilateral relationship between China and the US, China and the US has have the same benefit, and the benefit is more than th…
46	NA	X	A	V	F	X	A	V	C	V	G	X	A	V	A	V	A	X	A	V	I	V	A	V	C	A	C	B	B	B	D	A	D	C	C	C	C	C	B	B	C	D	D	C	D	C	A	C	I think after America and China…in its 40 years, we go forward and make a big progress. In this process, we also have some difficulties but we still go forward. The benefits between America and China are big, the benefit is bigger than the bad effect. So China and America will keep a firm relation with each other. And this relation is benefit to each other and benefit to the world. We keep going …
47	NA	X	NA	X	A	V	A	V	NA	X	NA	X	C	V	A	V	A	V	F	V	B	X	A	V	D	C	C	C	D	D	E	B	C	D	E	D	E	E	B	E	E	E	B	B	D	C	C	C	About 40 years, the relationship between China and the America is go ahead. In short, the road is difficult, but there are a lot of changes in the relationship. However, it is go ahead all the time, because there are many common benefits between China and America, even though there’re many argument as well. Keep bilateral relations is very important for China and America, it’s benefit China and A…
48	NA	X	A	V	NA	X	A	V	C	X	F	X	A	V	NA	X	A	X	A	X	I	X	A	X	C	B	C	D	C	C	E	D	D	D	C	D	D	B	D	C	D	D	D	E	D	D	D	D	The description of the background is more complex but nowadays the result is how the relationship between China and the America should be and what way we choose to go. Before we have set up the contribution about 40 years, our relationship has keeping push forwards, and get a lot of good results. We have some conflicts through the ways, we think we must still push forward and America and China ha…
49	NA	X	A	X	A	V	A	V	NA	X	F	X	A	V	A	V	C	X	F	X	I	X	A	X	D	B	D	C	B	D	D	B	D	B	D	C	C	C	D	D	D	C	C	D	C	C	C	C	China and America has been 40 years of this relationship, and will it will be always went on and get good grade, but changes…and the trend goes on and will not change because China and American have the same benefit and it can benefit each other and more than the rest. China and the America keep this relationship not only benefit each other but benefit the whole world. And the big situation that …
50	B	V	A	V	A	V	A	V	A	V	G	V	C	V	A	V	A	V	A	V	B	V	A	V	E	E	E	E	E	E	E	E	E	E	E	E	E	E	D	C	E	E	D	D	E	D	D	E	Your description and problem proposal on Sino-US problem are complicated and too much, but you can conclude that yourself that how is the Sino-US relation for now and what will the future be like. I think during the 40 years of the establishment of relationship between China and the US, we have always been forging ahead and achieving fruitful results, although the process is hard and always chang…
51	NA	X	A	V	NA	X	A	V	A	X	G	V	A	V	A	X	A	V	A	V	I	V	NA	X	D	B	D	C	B	D	E	B	D	C	D	B	D	C	D	D	D	D	D	D	D	C	C	C	Since China and the US has formed relations, the China always being forward and has made great progress. Although there have some troubles, but the trend of forward hasn’t changed. The China and US has keep a stable bilateral relations, it can benefit not only China and US but the whole world. I think the forward trend could not change, and can keep moving. They have the same benefit. Of course, …
52	NA	X	A	V	G	V	D	V	F	V	G	X	C	V	A	V	A	V	A	V	B	X	A	V	E	E	C	C	D	D	E	E	C	E	D	D	D	D	C	C	D	D	D	D	C	D	A	D	There’s a lot of issues about the background and the question. So how’s the relationship between China and America on earth and how should we do. In the past 40 years, the Chinese and America’s relationship has been making progress all the time, but there is a lot of setbacks and a lot of changes. But the trend of the making progress has never been changed. There’s a lot of common benefits betwee…
53	NA	X	NA	X	NA	X	NA	X	A	V	G	V	A	V	NA	X	A	X	NA	X	NA	X	NA	X	D	B	D	D	D	D	D	D	D	D	D	D	D	D	D	D	D	D	D	D	D	D	D	D	The question is basically about what relationship between China and the US are now and in the future. In the past 40 years, we went through many troubles and hard times, but there’ re many successful explorations. In general, our relationship is having a good future, and the bilateral relationship is not only beneficial for China and the US but is also good for the world. I think we should going …
54	A	V	A	V	A	V	NA	X	A	X	G	V	A	V	A	V	C	X	A	V	B	V	A	X	C	A	C	C	E	D	E	E	C	D	D	B	D	A	C	C	C	C	D	E	E	C	C	C	The background you have described and the question is enough, and you have made a good conclusion. And now what is China and America now and what the future will be. I think we have built our bridge 40 years’ long, and we always forward to a good future, and make great achievement. Although we have made some difficulties, but the forward trend will not change, because China and the US have common…
55	NA	X	A	X	A	V	A	V	C	V	F	V	C	V	A	X	A	V	A	V	D	X	A	V	A	C	A	A	D	D	E	D	C	C	C	C	D	E	D	D	D	D	D	C	D	C	C	C	You describe the background and come forward a lot of problems, and I say you want to ask the USA and the China’s relationship and how will be become. I think China and the US have built a bilateral relationship since 40 years. We achieved a lot of achievement. Since we come forward not very successful, but our bilateral relationships are keep going, because China and the US, we have the win-win …
56	A	V	A	X	A	V	NA	X	A	V	A	V	C	V	A	V	A	V	A	X	A	X	NA	X	B	B	A	D	C	D	D	A	C	A	D	B	C	C	A	A	D	C	D	D	B	B	B	B	The description of background and the problem has more, and I will put on some key points about how is relationship about Chinese and America and how do we do in the future. China and America have built the relationship since 40 years. I can see we will all go head and the trend of go head had no change. And Chinese and America have more profit, and we will keep bilateral relation stably, and the…
57	NA	X	F	X	A	V	A	X	A	V	F	X	C	V	A	X	A	V	A	V	A	X	A	V	D	A	C	B	D	D	E	B	E	D	D	B	D	A	D	B	E	E	D	B	D	B	B	B	China and the America has been cooperating for 40 years. We are always moving forward and the achievement is there. Although the process is changing all the way, but our movement of moving forward is not change. China and the America have the same benefit. If China and American keep the bilateral relation, it benefit to China and the America and also benefit to the world. So the movement of movin…
58	NA	X	NA	X	NA	X	A	V	A	X	E	X	A	X	NA	X	C	V	A	V	B	X	A	V	D	D	B	B	B	D	E	B	D	D	C	B	D	D	C	C	C	C	D	D	D	C	C	C	Your background and problems are many, I think the relations between China and the United States is crucial. And the after establish the relation for 40 years, our relationship is go forwards constantly but it has have many frictions and is changeable. We have the steady benefit, and it is bigger than the friction. And I think if we had the stable bilateral relation, it is beneficial for both of …
59	A	V	G	V	C	V	C	V	F	V	G	X	A	V	A	V	A	V	NA	X	B	V	A	V	C	B	E	C	A	D	E	A	D	C	C	C	E	E	E	E	E	E	E	E	C	C	C	C	You have a lot of background information and I want to make a conclusion: how does the relationship between China and the US and how’s going in the future. I think, in past 40 years, the relationship between them are developing and there’re a lot of great influence. Although we have many economic and trade frustration, however I think trend of development is still here and our common benefit out-…
60	NA	X	G	X	G	X	NA	X	NA	X	NA	X	C	V	NA	X	C	X	A	X	NA	X	NA	X	D	C	C	C	D	C	D	C	C	C	D	B	D	B	D	D	D	D	D	D	D	C	C	C	There’re many problems in the Chinese and the American’s relationship. How about the Chinese and America’s relationship. I think Chinese and the American’s relationship is always go ahead, and there’re best option in the relationship in 40 years. And because of there are most same and there are economic and trade frictions. I think…Sometimes, the Chinese and America’s relationship was…but their c…
61	C	V	A	V	A	V	A	V	A	V	G	V	NA	X	A	V	A	V	NA	X	I	X	A	X	D	D	C	C	D	D	E	C	D	C	D	D	D	D	D	D	D	C	D	D	C	D	C	D	You described a lot of about the background and put up a lot of questions, but the key point is about the situation of China and US and our future relation. China and the US established the relationship for 40 years， and we have achieved a lot progresses. Although there’re many difficulties, the main trend of keeping forward is still the same. China and the US have a lot of the same benefits, and…
62	A	V	A	X	G	V	C	V	A	V	G	V	A	X	A	V	A	V	A	V	D	X	A	V	D	A	D	B	D	D	E	A	D	D	D	B	C	C	B	B	D	D	D	D	B	C	C	C	The description of background and questions are too much to do a summary: what is the future about China and America’s future. Since the 40 years we have work together, our relations are always going on. We get too much, and we work very hard. There’re some changeable. But we’re still going on. There are too much common benefits between America and China, it’s more than our confrontation, and our…
63	C	V	NA	X	C	X	NA	X	A	V	E	V	A	X	A	V	A	V	A	V	I	X	A	X	E	A	B	B	B	D	E	B	E	A	D	B	E	C	C	C	D	D	D	D	D	C	A	A	Your description of the backgrounding is too many, and in a word what the situation now between China and America, and what way should we choose in the future. And China and America built the relationship for 40 years and even the process …and the changes are so many, they are go straight on and keep going. And I think the mutal benefit between China and America is more than their…During the proc…
64	A	X	NA	X	A	X	A	V	F	V	G	V	C	V	NA	X	G	X	A	V	NA	X	A	V	D	B	D	C	B	D	E	B	D	D	D	B	D	D	D	C	D	D	D	C	E	C	C	B	The background information and your description are so many and I did it in just one question is that, what the relationship between China and the American on earth and how about future development between China and the US. After making foundation for 40 years, the relationship between China and the American has still developed, although we have faced many troubles and difficulties, but our relat…
65	NA	X	A	X	C	X	NA	X	NA	X	G	V	A	X	A	X	A	V	A	V	B	X	A	X	D	B	D	D	D	D	E	D	D	D	D	D	D	D	D	D	D	D	D	C	D	D	C	D	After the connection between China and the US established for 40 years, we keep moving forward and has got great effects and we have experienced many challenges but the trend to move forward will not change because our mutual benefits are more than our argument. So it will benefit both of us and the world. I think moving forward in challenges together will not and should not change. The total tre…
66	A	V	A	V	A	X	A	V	A	V	G	X	A	X	A	X	A	V	A	X	B	V	A	V	D	C	C	D	D	D	E	D	D	C	D	C	D	D	C	C	D	D	D	C	D	D	C	C	There are many question about the Sino-US relations. I simply can make a conclusion about it: what actually is our relationship going and how is it going in the future. I think, for more than 40 years, our relationship always go in together, and always go forward. We make many progress although there’re some conflicts and difficulties. And the total trend is go forward. We have many same benefits…
Note:
a. L1-L12 show the raw data of the strategy selection and correctness of translation of the target 12 LVC segments; V = correct; X = incorrect.
b. Q1-Q24 show the raw data of vocabulary knowledge questionnaire.
